# Supplementary material for: Novel multi-layer cross-linked TiO2/C nanosheets and their photocatalytic properties
Source: Royal Society of Chemistry journal article supplement (doi:10.1039/c3nj01342a), 2014-01-01
Supplement: c3nj01342a.pdf [file c3nj01342a.pdf]

## Supplementary Information

New journal of chemistry

### Novel multi-layer cross-linked TiO<sub>2</sub>/C nanosheets and their photocatalytic properties

Wei Zhou, Yan Liu, Yanzong Zhang, Gang Yang, Shihuai Deng, Fei Shen, Hong Peng,

Lilin Wang

**Table S1** Energy distribution of Hg lamp

| Wavelength (nm) | relative energy (%) | Wavelength (nm) | relative energy (%) |
|-----------------|---------------------|-----------------|---------------------|
| 1367            | 15.3                | 289             | 6.0                 |
| 1129            | 12.6                | 280             | 9.3                 |
| 1014            | 40.6                | 275             | 2.7                 |
| 577 ~ 579       | 76.5                | 270             | 4.0                 |
| 546             | 93.0                | 265             | 15.3                |
| 436             | 77.5                | 257             | 6.0                 |
| 405 ~ 408       | 42.2                | 254             | 16.6                |
| 365 ~ 366       | 100.0               | 248             | 8.6                 |
| 334             | 9.3                 | 240             | 7.3                 |
| 313             | 49.9                | 238             | 8.6                 |
| 302 ~ 303       | 23.9                | 236             | 6.0                 |
| 297             | 16.6                | 232             | 8.0                 |

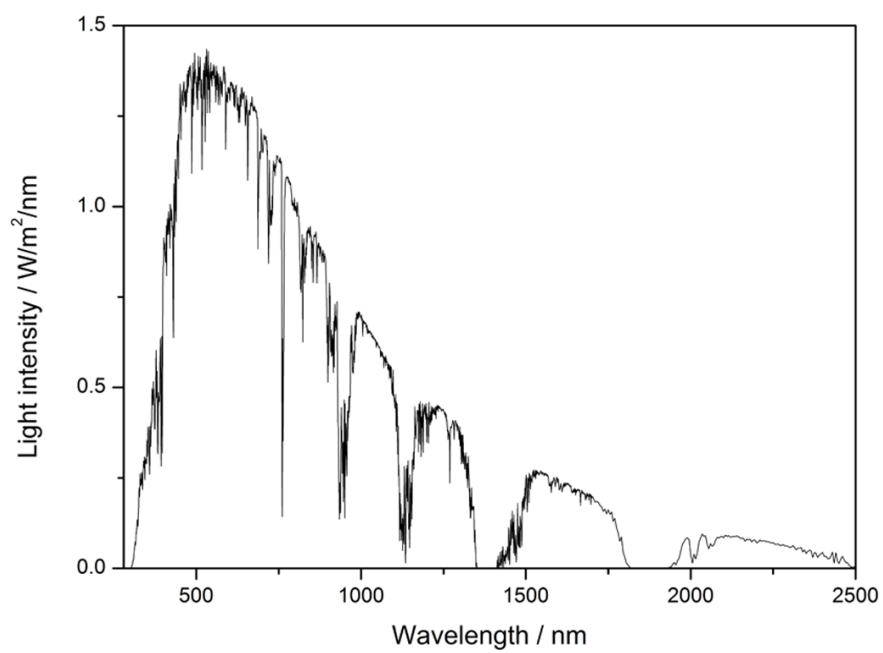

**Figure S1** Solar radiation spectrum
